# Supplementary material
Source: Springer Nature journal article supplement (https://www.springermedizin.de/resource/supplementary/12958_2009_538_MOESM4_ESM.pdf/9568256)

# Promoter Length (bp)

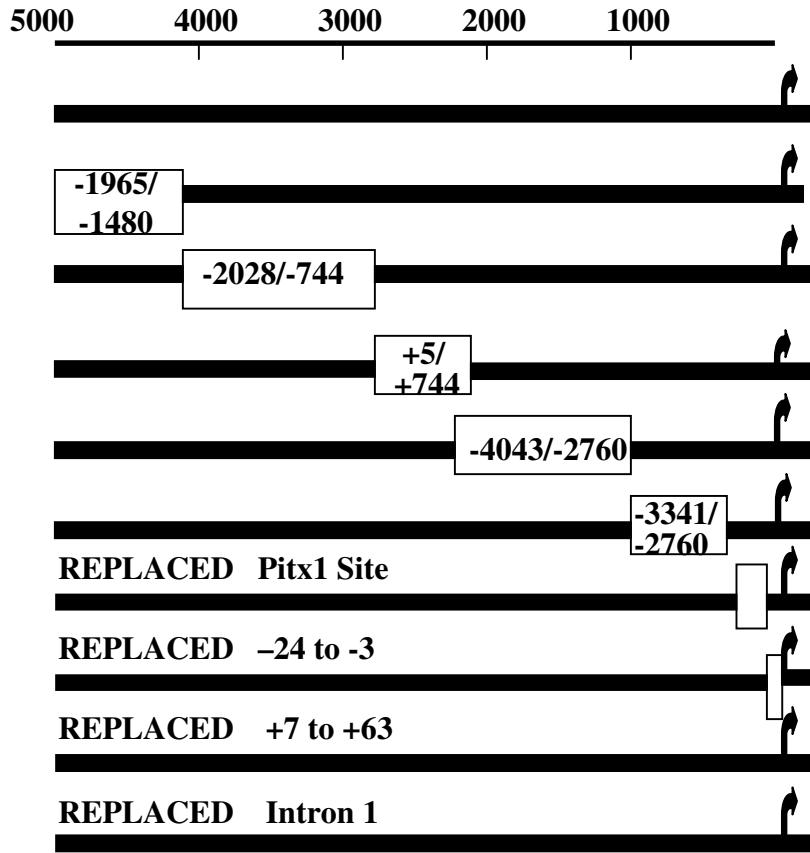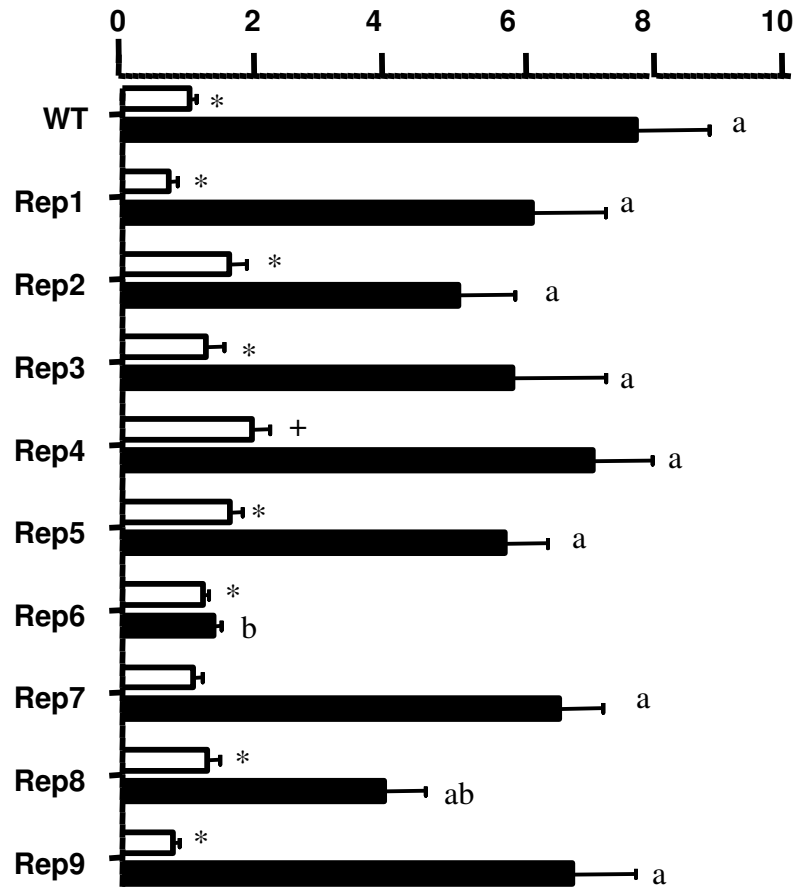

Relative Basal Expression

Fold-induction by Activin A

Supplement: MOESM4 [file 9568256]
